# Supplementary material for: Wounds of Companion Animals as a Habitat of Antibiotic-Resistant Bacteria That Are Potentially Harmful to Humans—Phenotypic, Proteomic and Molecular Detection
Source: MDPI journal article supplement (doi:10.3390/ijms25063121), 2024-03-08
Supplement: s1 [file s1]

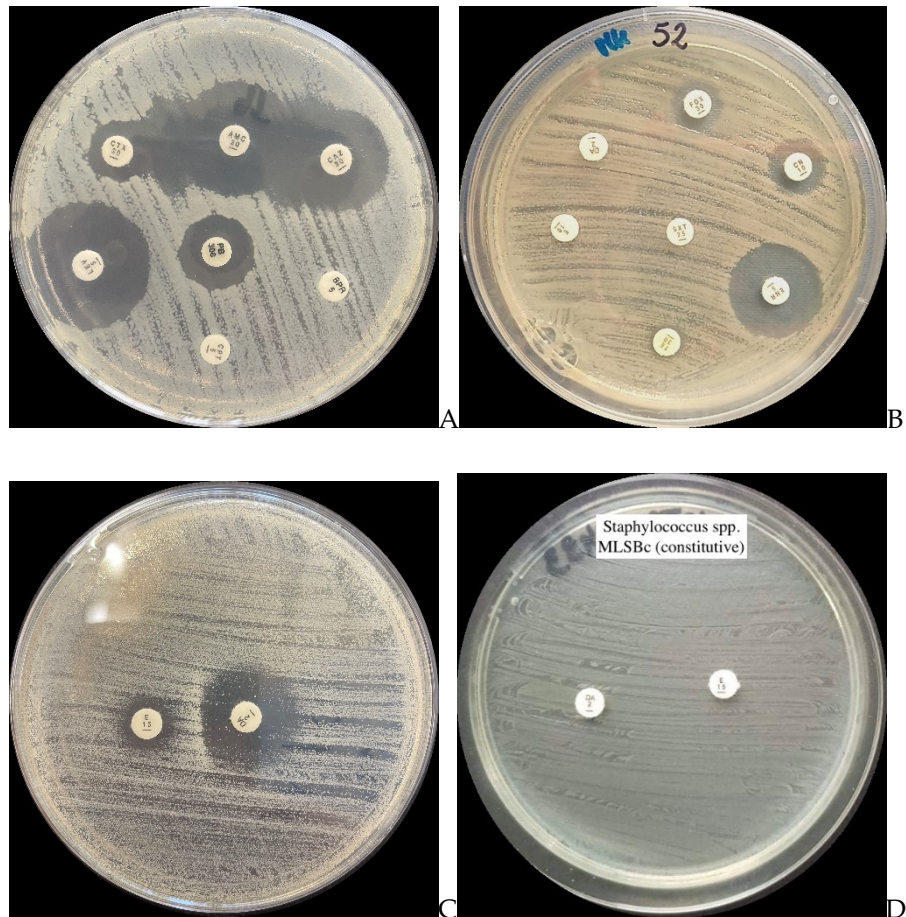

**Figure S1.** The resistance phenotypes observed in the examined groups of bacteria. A – extended spectrum beta lactamases (ESBL) in *Enterobacterales*; B – methicillin resistance in *Staphylococcus pasteurii*; C – inducible resistance to macrolides, lincosamids and streptogramins b (MLSb) in *Staphylococcus pseudintermedius*; D – constitutive MLSb in *Staphylococcus* spp..
