# Supplementary material for: Wounds of Companion Animals as a Habitat of Antibiotic-Resistant Bacteria That Are Potentially Harmful to Humans—Phenotypic, Proteomic and Molecular Detection
Source: MDPI journal article supplement (doi:10.3390/ijms25063121), 2024-03-08
Supplement: s1 [file s1]

**Table S1.** Species of bacteria isolated from wounds of three groups of animals.

| <b>Species</b>                       | <b>total (n=136)</b> | <b>cats (n=52)</b> | <b>dogs (n=80)</b> | <b>rabbits (n=4)</b> |
|--------------------------------------|----------------------|--------------------|--------------------|----------------------|
| <b>Gram-negative</b>                 | <b>65 (47.79)</b>    | <b>23 (44.23)</b>  | <b>38 (47.50)</b>  | <b>4 (100)</b>       |
| <i>Acinetobacter baumannii</i>       | 1 (0.74)             | 1 (1.92)           | 0                  | 0                    |
| <i>Acinetobacter calcoaceticus</i>   | 1 (0.74)             | 0                  | 1 (1.25)           | 0                    |
| <i>Acinetobacter johnsonii</i>       | 1 (0.74)             | 1 (1.92)           | 0                  | 0                    |
| <i>Acinetobacter pittii</i>          | 2 (1.47)             | 0                  | 1 (1.25)           | 1 (25)               |
| <i>Acinetobacter ursingii</i>        | 5 (3.68)             | 5 (9.62)           | 0                  | 0                    |
| <i>Aeromonas media</i>               | 1 (0.74)             | 0                  | 1 (1.25)           | 0                    |
| <i>Brevundimonas diminuta</i>        | 2 (1.47)             | 1 (1.92)           | 1 (1.25)           | 0                    |
| <i>Citrobacter freundii</i>          | 3 (2.21)             | 2 (3.85)           | 1 (1.25)           | 0                    |
| <i>Enterobacter cloacae</i>          | 1 (0.74)             | 1 (1.92)           | 0                  | 0                    |
| <i>Enterobacter hormaechei</i>       | 2 (1.47)             | 0                  | 2 (2.50)           | 0                    |
| <i>Escherichia coli</i>              | 11 (8.09)            | 1 (1.92)           | 8 (10.0)           | 2 (50)               |
| <i>Hafnia alvei</i>                  | 1 (0.74)             | 0                  | 1 (1.25)           | 0                    |
| <i>Klebsiella pneumoniae</i>         | 2 (1.47)             | 0                  | 1 (1.25)           | 1 (25)               |
| <i>Klebsiella spp.</i>               | 1 (0.74)             | 1 (1.92)           | 0                  | 0                    |
| <i>Leclercia adecarboxylata</i>      | 1 (0.74)             | 0                  | 1 (1.25)           | 0                    |
| <i>Pantoea agglomerans</i>           | 2 (1.47)             | 0                  | 2 (2.50)           | 0                    |
| <i>Pantoea sp.</i>                   | 1 (0.74)             | 0                  | 1 (1.25)           | 0                    |
| <i>Moraxella osloensis</i>           | 1 (0.74)             | 1 (1.92)           | 0                  | 0                    |
| <i>Proteus mirabilis</i>             | 3 (2.21)             | 0                  | 3 (3.75)           | 0                    |
| <i>Proteus vulgaris</i>              | 5 (3.68)             | 4 (7.69)           | 1 (1.25)           | 0                    |
| <i>Pseudomonas aeruginosa</i>        | 3 (2.21)             | 0                  | 3 (3.75)           | 0                    |
| <i>Pseudomonas putida</i>            | 3 (2.21)             | 1 (1.92)           | 2 (2.50)           | 0                    |
| <i>Pseudomonas graminis</i>          | 1 (0.74)             | 0                  | 1 (1.25)           | 0                    |
| <i>Pseudomonas fulva</i>             | 1 (0.74)             | 0                  | 1 (1.25)           | 0                    |
| <i>Pseudomonas koreensis</i>         | 1 (0.74)             | 1 (1.92)           | 0                  | 0                    |
| <i>Psychrobacter sanguinis</i>       | 2 (1.47)             | 0                  | 2 (2.50)           | 0                    |
| <i>Psychrobacter pulmonis</i>        | 1 (0.74)             | 0                  | 1 (1.25)           | 0                    |
| <i>Serratia marcescens</i>           | 3 (2.21)             | 3 (5.77)           | 0                  | 0                    |
| <i>Serratia liquefaciens</i>         | 1 (0.74)             | 0                  | 1 (1.25)           | 0                    |
| <i>Stenotrophomonas maltophilia</i>  | 2 (1.47)             | 0                  | 2 (2.50)           | 0                    |
| <b>Gram-positive</b>                 | <b>71 (52.21)</b>    | <b>29 (55.77)</b>  | <b>42 (52.50)</b>  | <b>0</b>             |
| <i>Bacillus pumilus</i>              | 1 (0.74)             | 0                  | 1 (1.25)           | 0                    |
| <i>Curtobacterium flaccumfaciens</i> | 1 (0.74)             | 0                  | 1 (1.25)           | 0                    |
| <i>Enterococcus avium</i>            | 1 (0.74)             | 0                  | 1 (1.25)           | 0                    |
| <i>Enterococcus faecalis</i>         | 11 (8.09)            | 3 (5.77)           | 8 (10)             | 0                    |
| <i>Enterococcus faecium</i>          | 3 (2.21)             | 2 (3.85)           | 1 (1.25)           | 0                    |
| <i>Enterococcus hirae</i>            | 2 (1.47)             | 1 (1.92)           | 1 (1.25)           | 0                    |
| <i>Kocuria rhizophila</i>            | 1 (0.74)             | 1 (1.92)           | 0                  | 0                    |
| <i>Lactococcus garvieae</i>          | 1 (0.74)             | 0                  | 1 (1.25)           | 0                    |
| <i>Lysinibacillus fusiformis</i>     | 1 (0.74)             | 0                  | 1 (1.25)           | 0                    |
| <i>Macrococcus canis</i>             | 1 (0.74)             | 0                  | 1 (1.25)           | 0                    |
| <i>Micrococcus luteus</i>            | 1 (0.74)             | 0                  | 1 (1.25)           | 0                    |
| <i>Microbacterium maritipicum</i>    | 1 (0.74)             | 0                  | 1 (1.25)           | 0                    |
| <i>Microbacterium oxydans</i>        | 1 (0.74)             | 0                  | 1 (1.25)           | 0                    |

|                                            |           |          |           |   |
|--------------------------------------------|-----------|----------|-----------|---|
| <i>Microbacterium<br/>paraoxydans</i>      | 1 (0.74)  | 1 (1.92) | 0         | 0 |
| <i>Microbacterium<br/>phyllosphaerae</i>   | 1 (0.74)  | 0        | 1 (1.25)  | 0 |
| <i>Peribacillus simplex</i>                | 1 (0.74)  | 1 (1.92) | 0         | 0 |
| <i>Staphylococcus aureus</i>               | 5 (3.68)  | 4 (7.69) | 1 (1.25)  | 0 |
| <i>Staphylococcus capitis</i>              | 2 (1.47)  | 2 (3.85) | 0         | 0 |
| <i>Staphylococcus cohnii</i>               | 1 (0.74)  | 1 (1.92) | 0         | 0 |
| <i>Staphylococcus devriesei</i>            | 1 (0.74)  | 0        | 1 (1.25)  | 0 |
| <i>Staphylococcus condimentii</i>          | 2 (1.47)  | 2 (3.85) | 0         | 0 |
| <i>Staphylococcus epidermidis</i>          | 2 (1.47)  | 1 (1.92) | 1 (1.25)  | 0 |
| <i>Staphylococcus felis</i>                | 2 (1.47)  | 2 (3.85) | 0         | 0 |
| <i>Staphylococcus haemolyticus</i>         | 1 (0.74)  | 0        | 1 (1.25)  | 0 |
| <i>Staphylococcus pasteurii</i>            | 1 (0.74)  | 0        | 1 (1.25)  | 0 |
| <i>Staphylococcus lentus</i>               | 1 (0.74)  | 1 (1.92) | 0         | 0 |
| <i>Staphylococcus<br/>pseudintermedius</i> | 13 (9.56) | 3 (5.77) | 10 (12.5) | 0 |
| <i>Staphylococcus schleiferi</i>           | 2 (1.47)  | 0        | 2 (2.50)  | 0 |
| <i>Staphylococcus<br/>saprophyticus</i>    | 1 (0.74)  | 0        | 1 (1.25)  | 0 |
| <i>Staphylococcus warneri</i>              | 1 (0.74)  | 1 (1.92) | 0         | 0 |
| <i>Staphylococcus sciuri</i>               | 1 (0.74)  | 0        | 1 (1.25)  | 0 |
| <i>Streptococcus canis</i>                 | 5 (3.68)  | 2 (3.85) | 3 (3.75)  | 0 |

---
