# Supplementary figures and images for: Wounds of Companion Animals as a Habitat of Antibiotic-Resistant Bacteria That Are Potentially Harmful to Humans—Phenotypic, Proteomic and Molecular Detection
Source: MDPI journal article supplement (doi:10.3390/ijms25063121), 2024-03-08

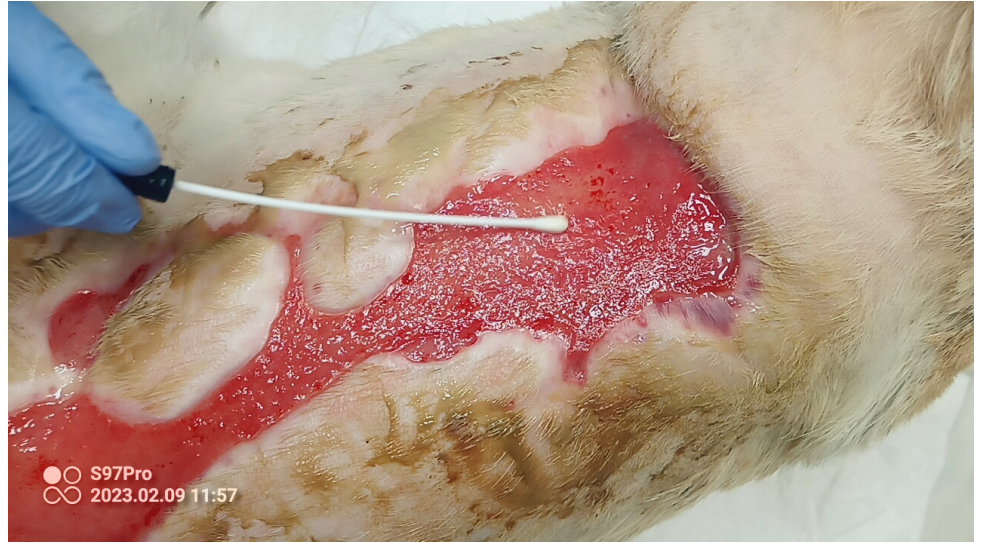

**Figure S2.** Collection of a swab sample from a skin wound of a dog.

Supplement: s1 [file s1]
